# Supplementary material for: CTC together with Shh and Nrf2 are prospective diagnostic markers for HNSCC
Source: PubMed Central journal article supplement (PMC10858504; doi:10.1186/s12860-024-00500-0), 2024-02-10
Supplement: 12860_2024_500_MOESM4_ESM.pdf [file 12860_2024_500_MOESM4_ESM.pdf]

**S1 Table: List of primers used for qRT-PCR**

| <b>Name of Primer</b>                 | <b>Direction</b> | <b>Sequence</b>      | <b>Tm</b> | <b>Source</b> |
|---------------------------------------|------------------|----------------------|-----------|---------------|
| <b>Shh</b> (Primer of targeted)       | F (5'→3')        | AGGACCCGGTTTGATCTTCT | 56.5      | <b>IDT</b>    |
|                                       | R (5'→3')        | GCCATGTFACACAGACAACC | 57.4      |               |
| <b>Nrf2</b> (Primer of targeted gene) | F (5'→3')        | GCGACGGAAAGAGTATGAGC | 55.7      |               |
|                                       | R (5'→3')        | GTTGGCAGATCCACTGGTTT | 55.6      |               |
| <b>GAPDH</b> (Primer of housekeeping) | F (5'→3')        | CAGCCTCAAGATCATCAGCA | 54.8      |               |
|                                       | R (5'→3')        | TGTGGTCATGAGTCCTTCCA | 55.7      |               |
