# Supplementary material for: CTC together with Shh and Nrf2 are prospective diagnostic markers for HNSCC
Source: PubMed Central journal article supplement (PMC10858504; doi:10.1186/s12860-024-00500-0), 2024-02-10
Supplement: 12860_2024_500_MOESM5_ESM.pdf [file 12860_2024_500_MOESM5_ESM.pdf]

## S2 Table

### Summary of hematological investigations

| Parameters           | Unit                       | Normal Level             | mean±sd       |               | p-value          | Statistical tool |
|----------------------|----------------------------|--------------------------|---------------|---------------|------------------|------------------|
|                      |                            |                          | CTC Positive  | CTC Negative  |                  |                  |
| <b>RBC</b>           | Million/mL                 | 4.7-6.1                  | 4.306±0.7083  | 4.603±0.4569  | <b>0.0280*</b>   | Student's t test |
| <b>WBC</b>           | /mL                        | 4500-11000               | 9142±2551     | 9430±2407     | 0.5223           | Student's t test |
| <b>Neutrophil</b>    | %                          | 45-70                    | 58.77±11.41   | 52.44±6.159   | <b>0.0002*</b>   | Student's t test |
| <b>Lymphocyte</b>    | %                          | 18-45                    | 31.57±9.292   | 30.67±10.13   | 0.6228           | Student's t test |
| <b>Eosinophil</b>    | %                          | 2-6                      | 5.604±7.163   | 4.056±4.349   | 0.1453           | Student's t test |
| <b>Monocyte</b>      | %                          | 2-8                      | 3.915±2.104   | 3.914±2.013   | 0.9987           | Student's t test |
| <b>Platelet</b>      | /Litre                     | 150000-450000            | 276419±90288  | 314000±93792  | <b>0.0466*</b>   | Student's t test |
| <b>Hemoglobin</b>    | gm/dL                      | M:13.2-16.6<br>F:11.6-15 | 12.03±1.437   | 12.05±1.610   | 0.9341           | Student's t test |
| <b>ESR</b>           | mm in 1 <sup>st</sup> hour | <15                      | 43.27±24.96   | 40.18±26.69   | 0.5166           | Student's t test |
| <b>S. Creatinine</b> | mg/dL                      | 0.74-1.35                | 0.9433±0.1984 | 0.9653±0.2648 | 0.6614           | Student's t test |
| <b>SGPT</b>          | U/L                        | 7-56                     | 24.64±12.75   | 33.07±37.04   | 0.2592           | Student's t test |
| <b>Hematocrit</b>    | %                          | 34.3-48.6                | 38.53±7.431   | 38.23±6.119   | 0.8534           | Student's t test |
| <b>MCV</b>           | fL                         | 80-100                   | 87.80±4.591   | 77.25±8.003   | <b>&lt;0001*</b> | Student's t test |
| <b>MCH</b>           | pg                         | 27.5-33.2                | 32.20±13.55   | 27.89±7.514   | 0.0802           | Student's t test |
| <b>MCHC</b>          | gm/dL                      | 32-36                    | 31.75±4.018   | 31.99±2.474   | 0.7447           | Student's t test |
| <b>NLR</b>           |                            |                          | 2.05672       | 1.75212       | <b>0.0219*</b>   | Student's t test |
| <b>MLR</b>           |                            |                          | 2.97493       | 1.51821       | <b>0.0100*</b>   | Student's t test |
