# Supplementary material for: CTC together with Shh and Nrf2 are prospective diagnostic markers for HNSCC
Source: PubMed Central journal article supplement (PMC10858504; doi:10.1186/s12860-024-00500-0), 2024-02-10
Supplement: 12860_2024_500_MOESM6_ESM.pdf [file 12860_2024_500_MOESM6_ESM.pdf]

**S3 Table**  
**Patients at risk**

| <b>Weeks elapsed</b> | <b>CTC &lt;2</b> | <b>CTC&gt;2</b> | <b>CTC Negative</b> |
|----------------------|------------------|-----------------|---------------------|
| 0.000                | 43               | 9               | 57                  |
| 4.000                | 43               | 9               | 57                  |
| 8.000                |                  | 8               |                     |
| 12.000               | 40               | 7               | 56                  |
| 16.000               |                  | 4               | 53                  |
| 20.000               | 38               | 2               | 50                  |
| 24.000               | 36               |                 | 47                  |
| 28.000               | 35               | 1               | 44                  |
| 32.000               | 30               |                 | 40                  |
| 36.000               | 26               |                 | 38                  |
| 40.000               | 23               |                 | 31                  |
| 48.000               | 20               |                 | 16                  |
| 52.000               |                  |                 | 16                  |
| 56.000               | 19               |                 |                     |
| 60.000               | 18               |                 | 15                  |

After the period of study, 18 and 15 patients are at risk among the CTC positive and CTC negative patients respectively.
